# Supplementary material for: Frequent Use of the IgA Isotype in Human B Cells Encoding Potent Norovirus-Specific Monoclonal Antibodies That Block HBGA Binding
Source: PubMed Central journal article supplement (PMC4927092; doi:10.1371/journal.ppat.1005719), 2016-06-29
Supplement: ppat.1005719.s001.pdf [file ppat.1005719.s001.pdf]

## Detection of hMAbs by goat anti-human Ig (IgA,IgG,IgM) secondary antibody conjugated reagent

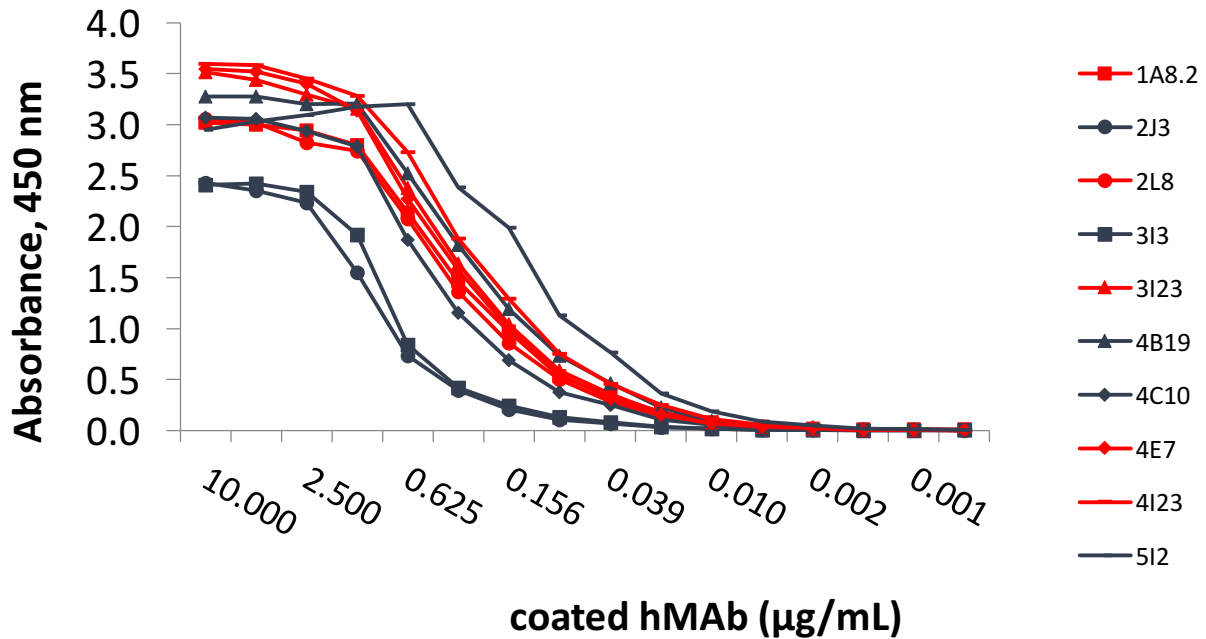

**Figure S1. Detection of IgA or IgG antibodies with a common conjugated antibody.** ELISA plates were coated with one of the ten human monoclonal antibodies in varying dilutions and then detected with the polyclonal goat anti-human secondary antibody suspension. IgA antibodies are shown in red, IgG antibodies in black.
