# Supplementary material for: Frequent Use of the IgA Isotype in Human B Cells Encoding Potent Norovirus-Specific Monoclonal Antibodies That Block HBGA Binding
Source: PubMed Central journal article supplement (PMC4927092; doi:10.1371/journal.ppat.1005719), 2016-06-29
Supplement: ppat.1005719.s003.pdf [file ppat.1005719.s003.pdf]

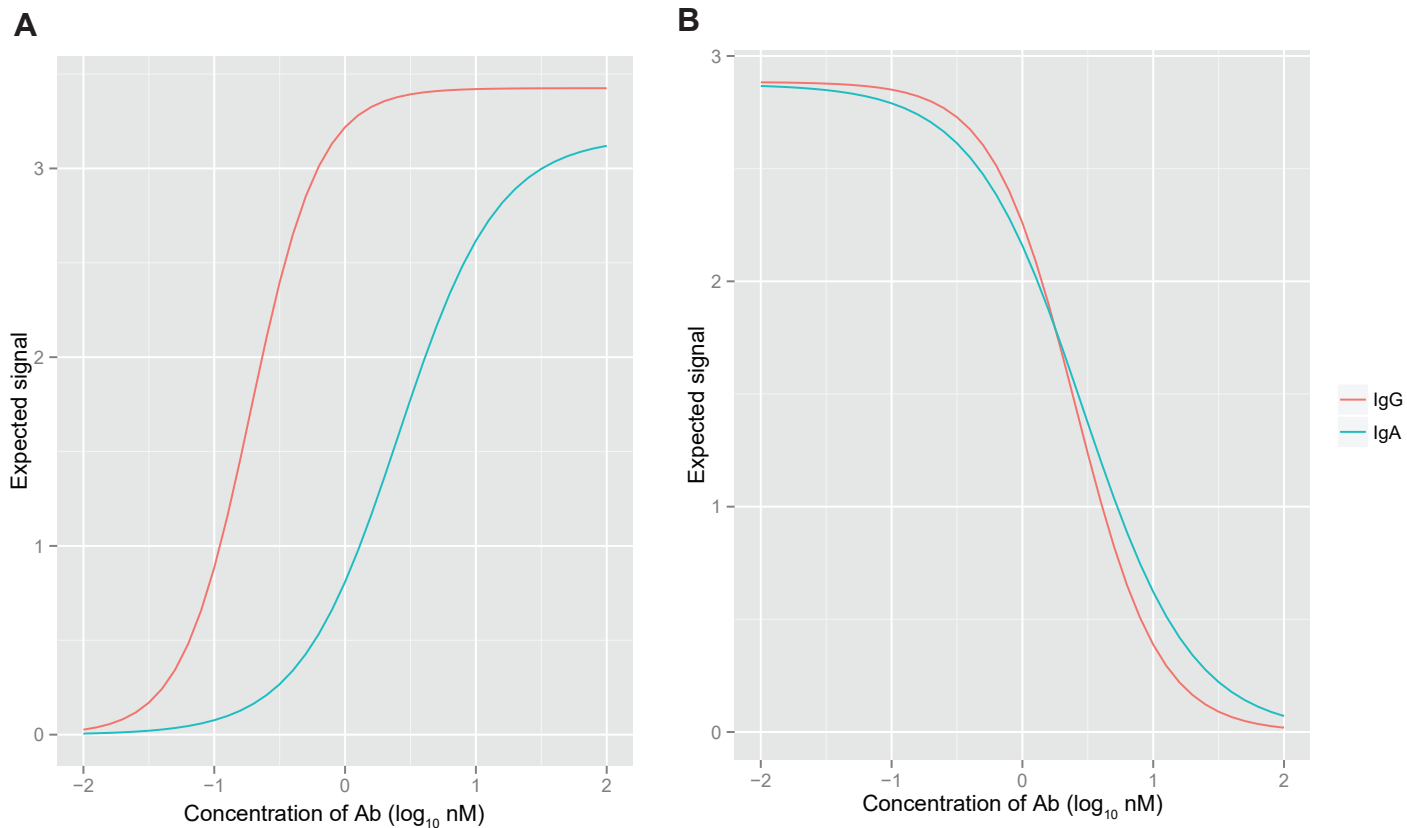

**Figure S3. Average binding and blocking profiles of IgG and IgA antibodies.** The dose-response curves for binding (A) or blocking (B) for all IgG and IgA antibodies were averaged to generate a representative curves for each class using R software package. The binding curves for IgG and IgA are significantly different ( $p < 0.001$ ), while there is insufficient evidence to show that IgG and IgA differ in blocking ( $p = 0.39$ ).
