# Supplementary material for: Frequent Use of the IgA Isotype in Human B Cells Encoding Potent Norovirus-Specific Monoclonal Antibodies That Block HBGA Binding
Source: PubMed Central journal article supplement (PMC4927092; doi:10.1371/journal.ppat.1005719), 2016-06-29
Supplement: ppat.1005719.s005.pdf [file ppat.1005719.s005.pdf]

**Figure S5.** Representative curves for blocking assays with each of the antibody clones

- dlgA
- mIgA
- IgG

4C10

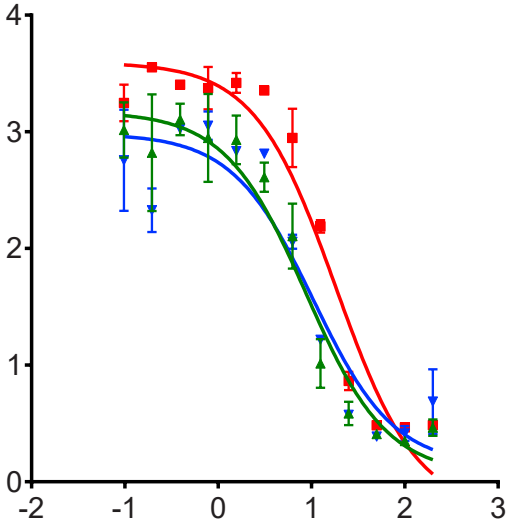

2J3

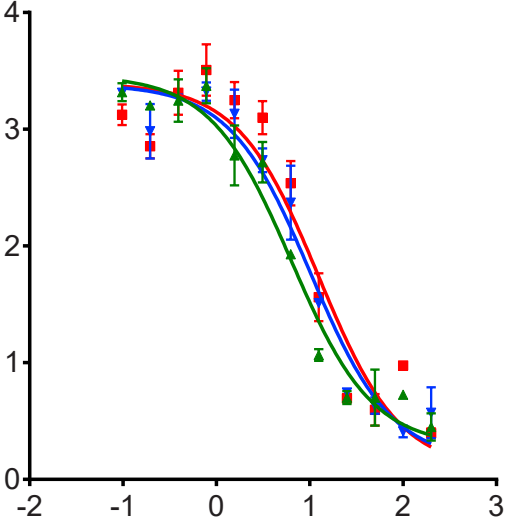

3I23

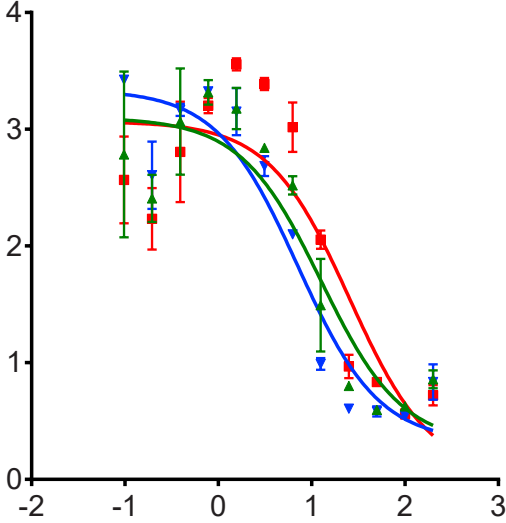

4I23

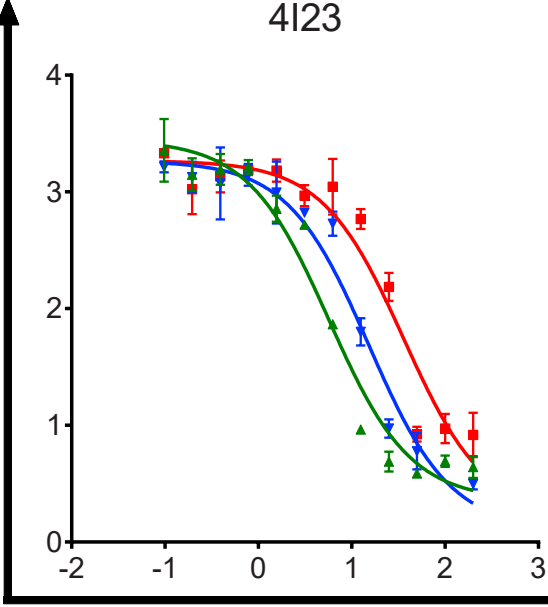

5I2

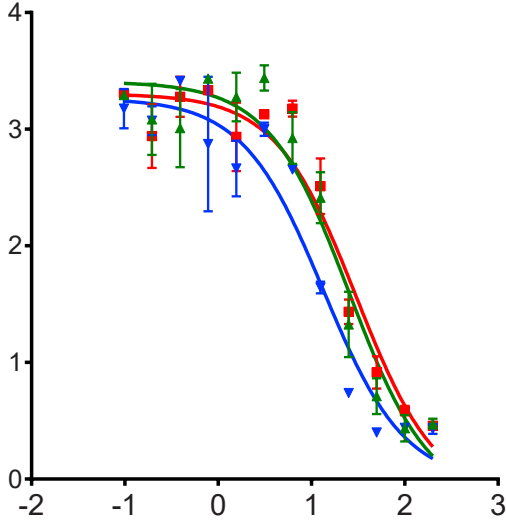

Absorbance, 450 nm

Concentration of Ab (log<sub>10</sub> nM combining sites)
