# Supplementary material for: Frequent Use of the IgA Isotype in Human B Cells Encoding Potent Norovirus-Specific Monoclonal Antibodies That Block HBGA Binding
Source: PubMed Central journal article supplement (PMC4927092; doi:10.1371/journal.ppat.1005719), 2016-06-29
Supplement: ppat.1005719.s006.pdf [file ppat.1005719.s006.pdf]

**Table S1. Primers used in RT-PCR for amplifying heavy or light chain antibody variable genes**

| <b>Oligo Name</b> | <b>Sequence 5' to 3'</b>                  |
|-------------------|-------------------------------------------|
| IgExp_H1          | GTTTTAAAAGGTGTCCTGTGTCARRTNCAGCTGGTRCAGTC |
| IgExp_H2          | GTTTTAAAAGGTGTCCTGTGTCAGRTCACCTTGARGGAGTC |
| IgExp_H3          | GTTTTAAAAGGTGTCCTGTGTSARGTGCAGCTGGTGGAGTC |
| IgExp_H4          | GTTTTAAAAGGTGTCCTGTGTCAGSTGCAGCTRSAGGAGTC |
| IgExp_H5          | GTTTTAAAAGGTGTCCTGTGTGARGTGCAGCTGGTGCAGTC |
| IgExp_H6          | GTTTTAAAAGGTGTCCTGTGTCAGGTACAGCTGCAGCAGTC |
| IgExp_H7          | GTTTTAAAAGGTGTCCTGTGTCAGGTGCAGCTGGTGCAGTC |
| IgExp_Hconst      | GATGGGCCCTTGAAGCTTGCTGAGGAGACGGTGACCAGGGT |
| IgExp_K1          | GAATCCCAGGCATGAGATCTGMCATCCRGWTGACCCAG    |
| IgExp_K2          | GAATCCCAGGCATGAGATCTGAKRTTGTGATGACYCAG    |
| IgExp_K3          | GAATCCCAGGCATGAGATCTGAAATWGTRWTGACRCAG    |
| IgExp_K4          | GAATCCCAGGCATGAGATCTGACATCGTGATGACCCAG    |
| IgExp_K5          | GAATCCCAGGCATGAGATCTGAAACGACACTCACGCAG    |
| IgExp_K6          | GAATCCCAGGCATGAGATCTGAWRTTGTGMTGACWCAG    |
| IgExp_Kconst      | GATGGCGGGAAGATGAAGACAGATGGTGGCGCCGCGAGT   |
| IgExp_L1          | GAATCCCAGGCATGAGATCTCAGTCTGTSBTGACKCAG    |
| IgExp_L2          | GAATCCCAGGCATGAGATCTCARTCTGCCCTGACTCAG    |
| IgExp_L3          | GAATCCCAGGCATGAGATCTTCTMTGDGCYRAYWCAG     |
| IgExp_L4          | GAATCCCAGGCATGAGATCTCWGCTGTGCTGACTCAA     |
| IgExp_L5          | GAATCCCAGGCATGAGATCTCAGSCTGTGCTGACTCAG    |
| IgExp_L6          | GAATCCCAGGCATGAGATCTAATTTTATGCTGACTCAG    |
| IgExp_L7          | GAATCCCAGGCATGAGATCTCAGRCTGTGGTGACTCAG    |
| IgExp_L8          | GAATCCCAGGCATGAGATCTCAGWCTGTGGTGACCCAG    |
| IgExp_L9          | GAATCCCAGGCATGAGATCTCAGCCTGTGCTGACTCAG    |
| IgExp_L10         | GAATCCCAGGCATGAGATCTCAGGCAGGGCTGACTCAG    |
| IgExp_L11         | GAATCCCAGGCATGAGATCTCGGCCCGTGCTGACTCAG    |
| IgExp_Lconst      | AGGGGGGAACAGAGTGACASTTGGAGCGGCCTTAGGCTG   |
