# Supplementary material for: Frequent Use of the IgA Isotype in Human B Cells Encoding Potent Norovirus-Specific Monoclonal Antibodies That Block HBGA Binding
Source: PubMed Central journal article supplement (PMC4927092; doi:10.1371/journal.ppat.1005719), 2016-06-29
Supplement: ppat.1005719.s007.pdf [file ppat.1005719.s007.pdf]

**Table S2.** Genetic characteristics of anti-norovirus mAbs

| mAb  | Class and isotype | EC <sub>50</sub> (ng/mL) | Heavy chain |        |         |                 |      |      |                      |              |              |          | Light chain |                 |      |      |                   |              |              |
|------|-------------------|--------------------------|-------------|--------|---------|-----------------|------|------|----------------------|--------------|--------------|----------|-------------|-----------------|------|------|-------------------|--------------|--------------|
|      |                   |                          | V gene      | J gene | D gene  | Number of AA in |      |      | HCDR3 AA sequence    | Nt mutations | AA mutations | V gene   | J gene      | Number of AA in |      |      | LCDR3 AA sequence | Nt mutations | AA mutations |
|      |                   |                          |             |        |         | CDR1            | CDR2 | CDR3 |                      |              |              |          |             | CDR1            | CDR2 | CDR3 |                   |              |              |
| 1A8  | IgG1, κ           | 23                       | 4-4*07      | 4*02   | 3-10*01 | 10              | 7    | 13   | CAREFYGGRGVVDSW      | 34           | 25           | nd       |             |                 |      |      |                   |              |              |
| 2L8  | IgG1, λ           | 25                       | 1-46*01     | 4*02   | 6-13*01 | 8               | 8    | 14   | CARGGISWYVTGFDYW     | 12           | 8            | L2-14*01 | L3*02       | 9               | 3    | 10   | CSSYTRSSTWVF      | 10           | 8            |
| 3I23 | IgG1, κ           | 25                       | 3-23*01     | 4*02   | 5-24*01 | 8               | 8    | 16   | CAKGVGSDFPSTRILDSW   | 24           | 16           | K3-20*01 | K3*01       | 7               | 3    | 8    | CHQYGTSTFTF       | 14           | 9            |
| 4E7  | IgG1, κ           | 15                       | 4-4*02      | 1*01   | 6-25*01 | 9               | 7    | 12   | CAIGGSASVPTKYW       | 14           | 10           | K1-39*01 | K2*01       | 6               | 3    | 9    | CQQSYSSPYTF       | 4            | 4            |
| 4I23 | IgG1, κ           | 23                       | 3-23*01     | 4*02   | 4-17*01 | 8               | 8    | 14   | CAKNAGDYAPSPADYW     | 8            | 6            | K6-21*01 | K1*01       | 6               | 3    | 9    | CHQSSTLPGTF       | 4            | 4            |
| 2J3  | IgA1, λ           | 342                      | 4-38-2*02   | 6*03   | 2-2*01  | 9               | 7    | 18   | CARDRSVVVPAAPLYYMDVW | 12           | 7            | L2-23*02 | L2*01       | 9               | 3    | 10   | CCSYATSTNLLF      | 11           | 9            |
| 3I3  | IgA1, λ           | 387                      | 4-39*01     | 5*02   | 3-3*01  | 10              | 7    | 13   | CARHPSWDRSWFDPW      | 24           | 17           | L2-8*01  | L2*01       | 9               | 3    | 10   | CSSYVGNNNFAF      | 13           | 11           |
| 4B19 | IgA1, κ           | 177                      | 3-30-3*01   | 4*02   | 4-11*01 | 8               | 8    | 10   | CARDLSASFQYW         | 25           | 18           | K2-30*01 | K5*01       | 11              | 3    | 10   | CMQGTHTWPMFTF     | 9            | 6            |
| 4C10 | IgA1, κ           | 459                      | 3-20*01     | 5*01   | 5-12*01 | 8               | 8    | 17   | CARDNRGQRGSSFGWFDSW  | 24           | 17           | K1-39*01 | K1*01       | 6               | 3    | 9    | CQQDYITPRTF       | 12           | 8            |
| 5I2  | IgA1, κ           | 120                      | 1-69*01     | 4*02   | 5-12*01 | 8               | 8    | 17   | CASNRRANRADDYDYYFDYW | 21           | 17           | K4-1*01  | K1*01       | 12              | 3    | 9    | CQQYYSIPRTF       | 8            | 7            |
