# Supplementary material for: Frequent Use of the IgA Isotype in Human B Cells Encoding Potent Norovirus-Specific Monoclonal Antibodies That Block HBGA Binding
Source: PubMed Central journal article supplement (PMC4927092; doi:10.1371/journal.ppat.1005719), 2016-06-29
Supplement: ppat.1005719.s008.pdf [file ppat.1005719.s008.pdf]

**Table S3.** Reciprocal hemagglutination inhibition titer for isotype switch variant antibodies (starting concentration 60 µg/mL)

| <b>Isotype</b> | <b>3I23</b> | <b>4I23</b> | <b>2J3</b> | <b>4C10</b> | <b>5I2</b> |
|----------------|-------------|-------------|------------|-------------|------------|
| IgG            | 320         | 20          | 80         | 640         | 640        |
| mIgA           | 2,560       | 40          | 80         | 640         | 160        |
| dIgA           | 640         | 40          | 160        | 1,280       | 640        |

Hemagglutination inhibition assays were performed as described previously [14]. In brief, human type O erythrocytes were collected from a healthy adult in Alsever's buffer, washed twice in Dulbecco's phosphate-buffered saline (PBS) without Ca<sup>2+</sup> or Mg<sup>2+</sup>, and pelleted by centrifugation at 500 x *g* for 10 min at 4 °C. Monoclonal antibodies (mAb; starting concentration 60 µg/mL) were diluted initially 1:10 in PBS with 0.85% saline (pH 5.5), and then serially 2-fold diluted. Four hemagglutination units (~2 ng) of Norwalk virus VLPs were mixed with the diluted monoclonal antibodies and incubated at room temperature for 30 min. The VLP-mAb mixture was added to an equal volume of 0.5% washed type O erythrocytes in 0.85% saline (pH 6.2) and incubated for 2 h at 4 °C. The HAI titer was determined by identifying the reciprocal of the highest dilution of mAb that inhibited hemagglutination by the VLPs.
